# Supplementary material for: Exploring the Long-Term Tissue Accumulation and Excretion of 3 nm Cerium Oxide Nanoparticles after Single Dose Administration
Source: MDPI journal article supplement (doi:10.3390/antiox12030765), 2023-03-21
Supplement: s1 [file s1]

# Exploring the Long Term Tissue Accumulation and Excretion of 3 nm Cerium Oxide Nanoparticles after Single Dose Administration

Lena M. Ernst<sup>1</sup>, Laura Mondragon<sup>1,2</sup>, Joana Ramis<sup>1</sup>, Muriel F. Gustà<sup>3,4</sup>, Tetyana Yudina<sup>3</sup>, Eudald Casals<sup>1,5</sup>, Neus G. Bastús<sup>3,4</sup>, Guillermo Fernández-Var<sup>6</sup>, Gregori Casals<sup>6,7</sup>, Wladimiro Jiménez<sup>6,8</sup>, Victor Puentes\*<sup>1,3,4,9</sup>

<sup>1</sup> Vall d'Hebron Research Institute (VHIR), 08035 Barcelona, Spain

<sup>2</sup> Josep Carreras Leukaemia Research Institute (IJC), Badalona, Spain

<sup>3</sup> Institut Català de Nanociència i Nanotecnologia (ICN2), CSIC, The Barcelona Institute of Science and Technology (BIST), Campus UAB, Bellaterra, Barcelona, Spain

<sup>4</sup> Networking Research Centre for Bioengineering, Biomaterials, and Nanomedicine (CIBER-BBN), Instituto de Salud Carlos III, Madrid, Spain.

<sup>5</sup> School of Biotechnology and Health Sciences, Wuyi University, Jiangmen, 529020, China

<sup>6</sup> Service of Biochemistry and Molecular Genetics, Hospital Clinic, Centro de Investigación Biomédica en Red de Enfermedades Hepáticas y Digestivas (CIBERehd), Institut d'Investigacions Biomèdiques August Pi i Sunyer (IDIBAPS), Barcelona, Spain

<sup>7</sup> Department of Fundamental Care and Medical-Surgical Nursing, Universitat de Barcelona, Spain.

<sup>8</sup> Departament de Biomedicina, Universitat de Barcelona, Spain.

<sup>9</sup> Institució Catalana de Recerca i Estudis Avançats (ICREA), Barcelona, Spain

\* Corresponding autor: [victor.puentes@vhir.org](mailto:victor.puentes@vhir.org)

## Content:

Table S1. Cerium content by organ and days, given in µg Ce/g tissue and % of injected dose.

Figure S1. Cerium excretion in µg Ce/g tissue between day 1 and day 100.

Figure S2. Mice weight evolution up to 30 days after nanoceria administration.

Figure S3. Dissolution of CeO<sub>2</sub> Nanoparticles at pH 1.7.

Figure S4. PourBoix diagram.

Figure S5. The liver and spleen are major targets for nanoparticles in CCl<sub>4</sub>-treated rats.

Extended Materials and Methods.

Table S1. Cerium content by organ and days, given in µg Ce/g tissue and % of injected dose.

| <i>Organ</i>       | <i>Time post-injection</i> | <i>Ce quantity per organ (µg/g tissue)</i> |                    | <i>Ce quantity per organ (%ID)</i> |                    |
|--------------------|----------------------------|--------------------------------------------|--------------------|------------------------------------|--------------------|
|                    |                            | Mean                                       | Standard deviation | Mean                               | Standard deviation |
| <i>Liver</i>       | 24 h                       | 89.818                                     | 15.763             | 82.46                              | 7.45               |
|                    | 9 days                     | 50.827                                     | 8.351              | 50.67                              | 7.78               |
|                    | 30 days                    | 47.727                                     | 6.637              | 46.03                              | 2.53               |
|                    | 100 days                   | 40.945                                     | 5.535              | 40.00                              | 2.44               |
| <i>Spleen</i>      | 24 h                       | 48.969                                     | 10.595             | 5.05                               | 0.57               |
|                    | 9 days                     | 47.688                                     | 10.035             | 4.51                               | 0.54               |
|                    | 30 days                    | 50.448                                     | 17.160             | 4.75                               | 0.70               |
|                    | 100 days                   | 38.814                                     | 2.834              | 4.08                               | 0.62               |
| <i>Kidney</i>      | 24 h                       | 5.064                                      | 1.927              | 0.629                              | 0.178              |
|                    | 9 days                     | 2.868                                      | 1.358              | 0.385                              | 0.138              |
|                    | 30 days                    | 3.880                                      | 0.792              | 0.508                              | 0.091              |
|                    | 100 days                   | 3.603                                      | 1.041              | 0.452                              | 0.106              |
| <i>Lung</i>        | 24 h                       | 1.006                                      | 1.016              | 0.189                              | 0.076              |
|                    | 9 days                     | 0.962                                      | 0.766              | 0.140                              | 0.119              |
|                    | 30 days                    | 0.939                                      | 0.318              | 0.120                              | 0.040              |
|                    | 100 days                   | 0.638                                      | 0.239              | 0.097                              | 0.027              |
| <i>Brain</i>       | 24 h                       | 0.033                                      | 0.020              | 0.009                              | 0.005              |
|                    | 9 days                     | 0.031                                      | 0.006              | 0.016                              | 0.015              |
|                    | 30 days                    | 0.017                                      | 0.005              | 0.005                              | 0.002              |
|                    | 100 days                   | 0.025                                      | 0.007              | 0.008                              | 0.002              |
| <i>Lymph Nodes</i> | 24 h                       | 2.333                                      | 1.357              | 0.098                              | 0.122              |
|                    | 9 days                     | 0.507                                      | 0.320              | 0.018                              | 0.020              |
|                    | 30 days                    | 4.111                                      | 1.912              | 0.368                              | 0.347              |
|                    | 100 days                   | 2.149                                      | 0.821              | 0.029                              | 0.016              |
| <i>Ovary</i>       | 24 h                       | 3.386                                      | 0.916              | 0.524                              | 0.082              |
|                    | 9 days                     | 2.466                                      | 1.208              | 0.359                              | 0.112              |
|                    | 30 days                    | 2.730                                      | 1.523              | 0.390                              | 0.176              |
|                    | 100 days                   | 2.135                                      | 2.037              | 0.377                              | 0.358              |
| <i>Bone Marrow</i> | 24 h                       | 1.750                                      | 0.879              | 0.036                              | 0.022              |
|                    | 9 days                     | 1.323                                      | 1.668              | 0.035                              | 0.047              |
|                    | 30 days                    | 1.202                                      | 0.215              | 0.045                              | 0.017              |
|                    | 100 days                   | 1.065                                      | 0.902              | 0.016                              | 0.007              |
| <i>Faeces</i>      | 24 h                       | 2.319                                      | 0.193              | 0.607                              | 0.193              |
|                    | 9 days                     | 0.100                                      | 0.061              | 0.100                              | 0.061              |
|                    | 30 days                    | 0.060                                      | 0.027              | 0.060                              | 0.027              |
|                    | 100 days                   | 0.057                                      | 0.016              | 0.057                              | 0.016              |
| <i>Urine</i>       | 24 h                       | 0.075                                      | 0.044              | 0.002                              | 0.001              |
|                    | 9 days                     | 0.047                                      | 0.025              | 0.002                              | 0.001              |
|                    | 30 days                    | 0.035                                      | 0.001              | 0.001                              | 0.000              |
|                    | 100 days                   | 0.006                                      | 0.006              | 0.001                              | 0.000              |

Figure S1. Mice weight evolution up to 30 days after nanoceria administration. n = 20, 15 and 10 at days 1, 9 and 30, respectively.

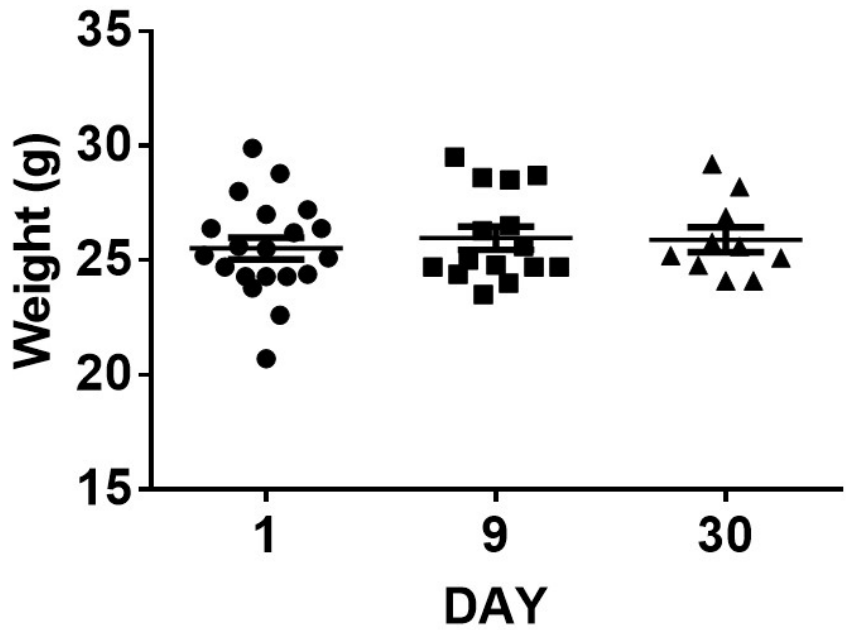

Figure S2. Cerium excretion in  $\mu\text{g Ce/g}$  tissue between day 1 and day 100.

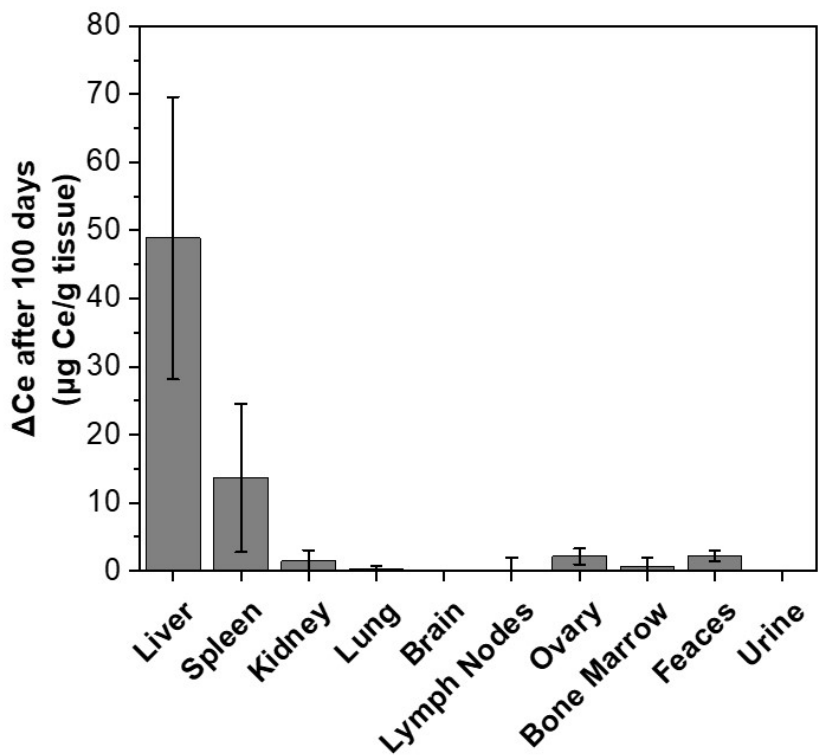

Figure S3. Dissolution of CeO<sub>2</sub> Nanoparticles at pH 1.7. Nanoceria was exposed to different pH 1.7. A decrease of UV-visible absorbance maximum with time confirms that NPs gradually dissolve. Complete dissolution can be observed after 3 hours.

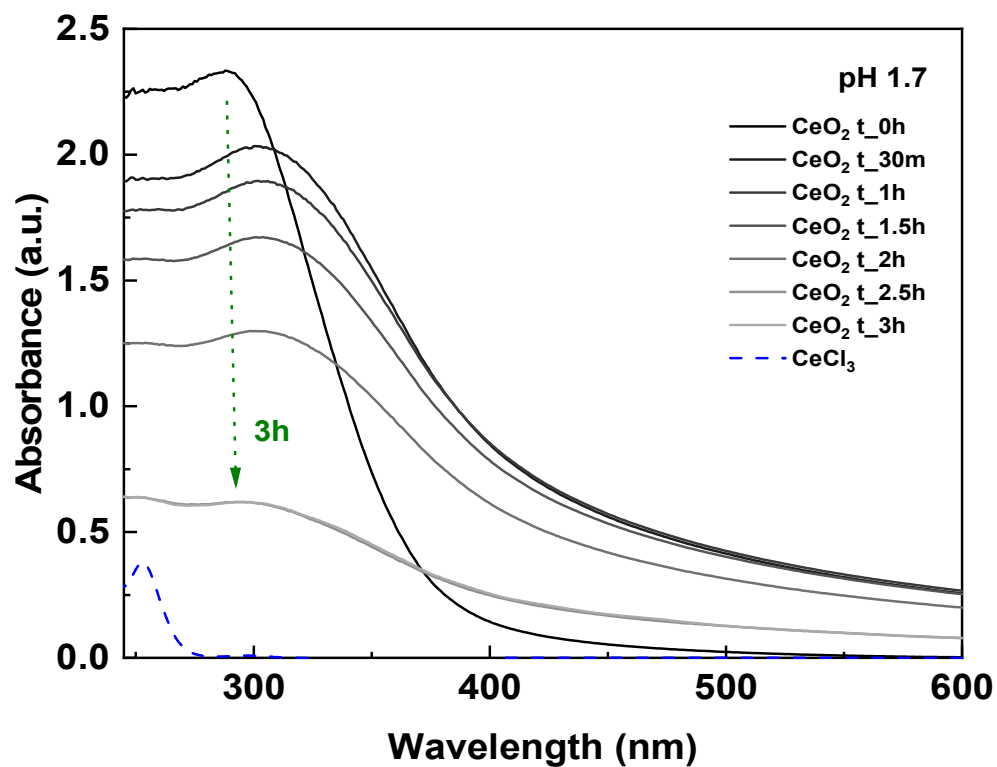

Figure S4. PourBoix diagram.

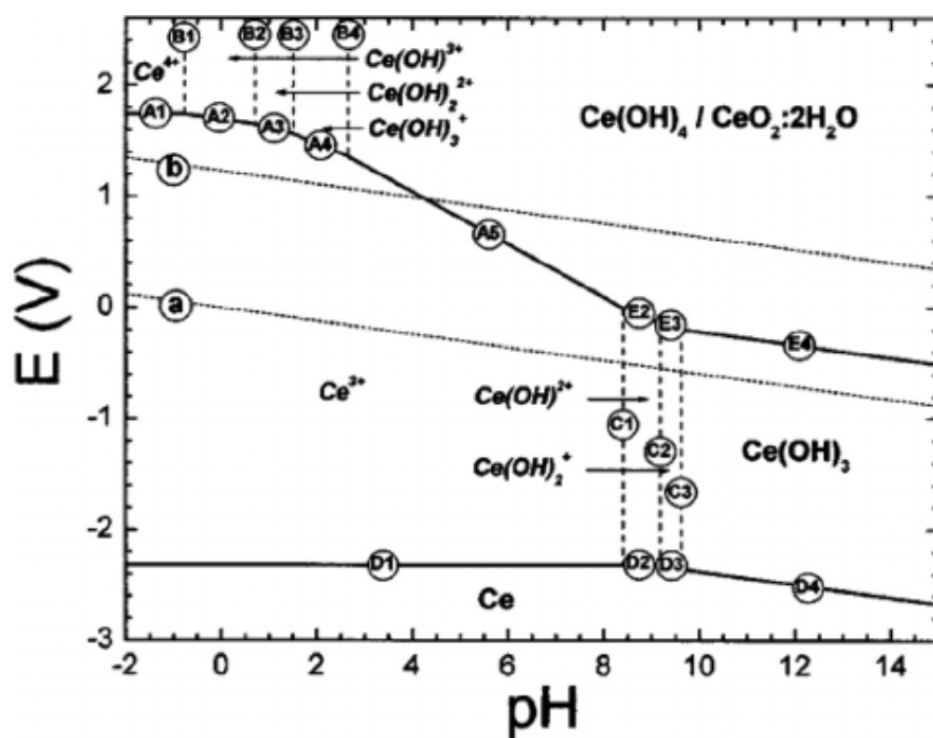

**Figure S5. The liver and spleen are major targets for nanoparticles in CCl<sub>4</sub>-treated rats.** *In vivo* biodistribution of Fe<sub>3</sub>O<sub>4</sub>NPs in magnetic resonance imaging (MRI) axial abdomen and brain slices of a CCl<sub>4</sub>-treated rat. The images on the left were taken from a representative CCl<sub>4</sub>-treated rat. The images on the right were obtained from the same rat 90 minutes after NPs administration. Liver (L), spleen (S) and, at a much lower intensity, the kidney (K) are shown in black after NPs administration, indicating where Fe<sub>3</sub>O<sub>4</sub>NPs are accumulated. No changes were observed in brain.

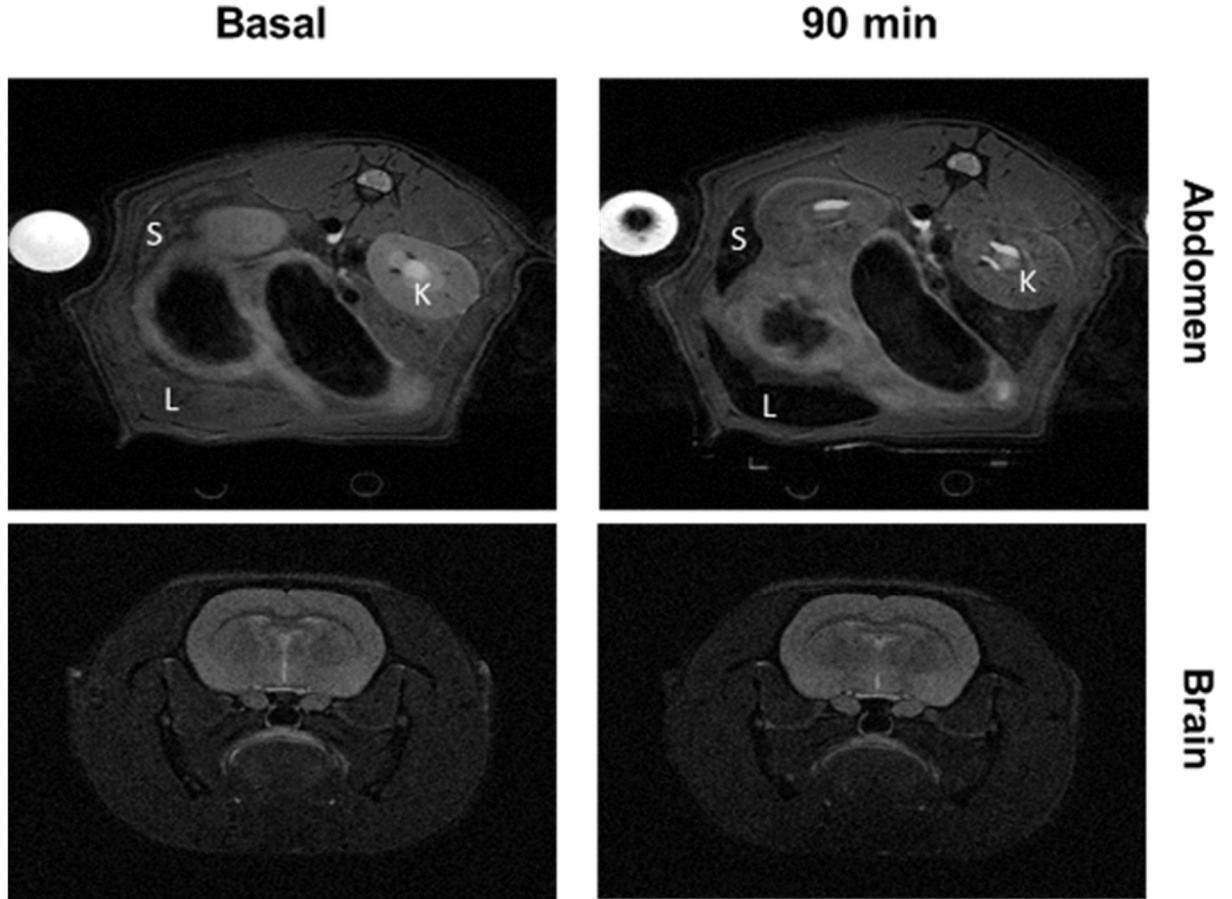

#### Extended Materials and Methods.

**Fitting with traditional PK models.** Experimental data were compared with the two principal pharmacokinetic models, the one-compartment and two-compartment models.

The one-compartment model assumes that the NPs are rapidly and uniformly distributed throughout the body and that the rate of NPs elimination is proportional to the amount of drug in the body. Therefore, the mathematical equation for a one-compartment model is:

$$C = Ae^{-k_1 t}$$

where C is the concentration of the NPs in the body, A is a constant that depends on the dose and volume of distribution,  $k_1$  is the elimination rate constant, and t is the time after administration.

A two-compartment model assumes that the NPs have distributed into two compartments: a central compartment (such as blood) and a peripheral compartment (such as tissues). The mathematical equation for a two-compartment model is:

$$C = Ae^{-k_1t} + Be^{-k_2t}$$

where C is the NPs concentration in the body, A a constant that depends on the amount of NPs in the central compartment and the volume of the central compartment, k<sub>1</sub> is the rate constant for distribution from the central compartment to the peripheral compartment, and t is time. B is a constant that depends on the number of NPs in the peripheral compartment and the volume of the peripheral compartment, and k<sub>2</sub> is the rate constant for elimination from the peripheral compartment.

In both models, the concentration of the drug in the body can be predicted based on the dose and elimination rate constant. These models help predict NPs concentrations over time and optimize drug dosing regimens.

Obtained results from the fitting.

| LIVER           | ONE compartment model           |
|-----------------|---------------------------------|
|                 | $y = A1 \cdot \exp(-x/t1) + y0$ |
| y0              | 43.65978 ± 3.34464              |
| A1              | 57.96516 ± 18.53957             |
| t1              | 4.35885 ± 2.39199               |
| Reduced Chi-Sqr | 0.60577                         |
| R-Square (COD)  | 0.93092                         |
| Adj. R-Square   | 0.79276                         |

| LIVER           | TWO compartment model                                  |
|-----------------|--------------------------------------------------------|
|                 | $y = A1 \cdot \exp(-x/t1) + A2 \cdot \exp(-x/t2) + y0$ |
| y0              | 40.8684 ± 0                                            |
| A1              | 26.12659 ± 0                                           |
| t1              | 13.78216 ± 0                                           |
| A2              | 26.12659 ± 0                                           |
| t2              | 16.84486 ± 0                                           |
| Reduced Chi-Sqr | 0                                                      |
| R-Square (COD)  | 0.41196                                                |
| Adj. R-Square   | 0                                                      |

| TOTAL           | ONE compartment model           |
|-----------------|---------------------------------|
| Equation        | $y = A1 \cdot \exp(-x/t1) + y0$ |
| y0              | 2.74302 ± 0.21221               |
| A1              | 2.77482 ± 0.97116               |
| t1              | 5.69658 ± 5.16136               |
| Reduced Chi-Sqr | 1.83185                         |

|                |         |
|----------------|---------|
| R-Square (COD) | 0.92074 |
| Adj. R-Square  | 0.76223 |

| TOTAL           | TWO compartment model                                  |
|-----------------|--------------------------------------------------------|
|                 | $y = A1 \cdot \exp(-x/t1) + A2 \cdot \exp(-x/t2) + y0$ |
| y0              | 2.56207 ± 0                                            |
| A1              | 1.34301 ± 0                                            |
| t1              | 14.70322 ± 0                                           |
| A2              | 1.34301 ± 0                                            |
| t2              | 17.9706 ± 0                                            |
| Reduced Chi-Sqr | 0                                                      |
| R-Square (COD)  | 0.86235                                                |
| Adj. R-Square   | 0                                                      |

**Organ distribution of Fe<sub>3</sub>O<sub>4</sub>NPs in CCl<sub>4</sub>-treated rats.** To assess the tissue distribution of NPs, equivalent Fe<sub>3</sub>O<sub>4</sub>NPs were intravenously administered to 3 CCl<sub>4</sub>-treated rats. Contrary to CeO<sub>2</sub>NPs, Fe<sub>3</sub>O<sub>4</sub>NPs possess magnetic resonance activity. It has been shown how the NPs distribution is mainly dictated by size, shape, surface charge and surface state. In this case NPs were similar in morphology and both, after exposure to serum get coated with albumin resulting in equivalent surface and charge. Once 5 min of CCl<sub>4</sub> administration was reached the animals received Fe<sub>3</sub>O<sub>4</sub>NPs (2 mg/Kg bw) and CCl<sub>4</sub> treatment was maintained thereafter. Magnetic resonance imaging (MRI) was performed at 30 and 90 min and at 4 and 8 weeks following the Fe<sub>3</sub>O<sub>4</sub>NPs administration. The MRI experiments were conducted on a 7.0 T BioSpec 70/30 horizontal animal scanner (Bruker BioSpin, Ettlingen, Germany) equipped with a 12-cm inner diameter actively shielded gradient system (400 mT/m). The receiver coil was a phased-array surface coil for the rat brain. The animals were placed in a prone position in a Plexiglas holder with a nose cone to administer anesthetic gases (isoflurane in a mixture of 30% O<sub>2</sub> and 70% CO<sub>2</sub>) and were held in position using tooth and ear bars, and adhesive tape. Tripilot scans were used for accurate positioning of the animal's liver in the isocenter of the magnet. T2-weighted images were acquired using a TurboRARE (rapid acquisition with rapid enhancement) sequence using the following parameters: repetition time= 3236 ms, echo time= 9 ms, RARE factor= 8, 4 averages, slice thickness= 1 mm with 1 mm gap between slices, number of slices= 60, field of view= 6 cm x 6 cm x 12 cm, matrix size= 256 x 256 x 60 pixels and a spatial resolution of 0.234 × 0.234 mm in a 1 mm slice thickness. To acquire the total volume of the abdomen, the acquisition was immediately repeated with the field of view shifted 1 mm in the z direction. The total scan time was 12 minutes. Images were processed and analyzed using the software ImageJ (National Institutes of Health, Bethesda, MD, USA).

**Experimental procedure – Optical Microscopy of Tissue sections.** 0.1 mL of 7 µg/mL of albuminized Au@SiO<sub>2</sub>-FITC@PS NPs were intravenously injected via tail-vein injection (n=2). At 24 h, mice were euthanized via cervical dislocation and liver and organ samples were collected (including liver, spleen, and kidney). The organs were briefly washed with normal saline, slightly dried with blotting paper, and immersed for 4 h in 4% formalin for tissue fixation. Next, tissues were embedded in paraffin following a standard protocol. For immunohistochemistry, paraffin-

embedded samples were sectioned at 4  $\mu\text{m}$  using a microtome and transferred to a poly-lysine coated glass slide. The paraffin was then removed with xylene and the samples rehydrated.

**Immunostaining.** Samples were permeabilized with Triton-X 0.2% for 10 min. Sections were incubated with anti- $\beta$ -Actin mouse monoclonal antibody (MAB8929, R&D Systems, at a dilution 1:100) overnight at 4 °C, followed by an incubation with a secondary antibody goat anti-mouse Alexa Fluor568 (FisherScientific, A11019, dilution 1:500). Nuclei were stained with Hoesch 3342 (FisherScientific, H1399, dilution 1:10000). Fading was controlled using the Prolong antifade mounting medium (11559306).

**Confocal Laser Scanning Microscopy (CSLM).** Samples were observed on the Confocal Laser Scanning Microscope (Zeiss LSM 980 Airyscan). Hoescht 33342 ( $\text{em}350/\text{ex}461$ ), Alexa Fluor-568 ( $\text{ex}578/\text{em}603$ ) and FITC ( $\text{em}490/\text{ex}525$ ) were observed using the standard fluorescence mode and pre-defined settings.

**Dissolution of nanoceria at acidic pH.** Nanoceria (500  $\mu\text{L}$ , 1.72 mg/mL) was exposed to 2.85 mL of HCl. Final pH of the solution was 1.7. Aliquots were extracted at different time points as labelled and measured by UV-visible.
